# Supplementary material for: Limitations of the 3-(4,5-dimethylthiazol-2-yl)-2,5-diphenyl-2H-tetrazolium bromide (MTT) assay when compared to three commonly used cell enumeration assays
Source: PubMed Central journal article supplement (PMC4349615; doi:10.1186/s13104-015-1000-8), 2015-02-20

### 3-BrPA

### 2-DG

### LON

## NRU Assay

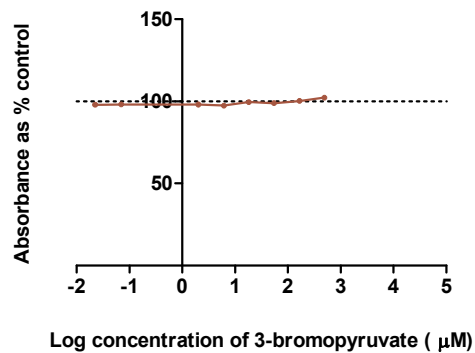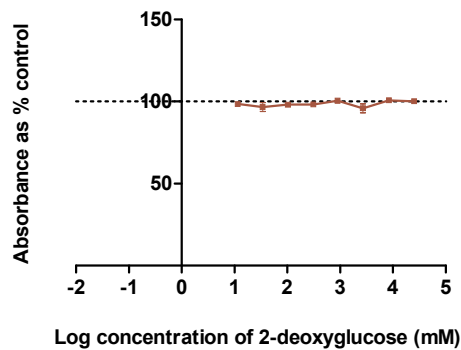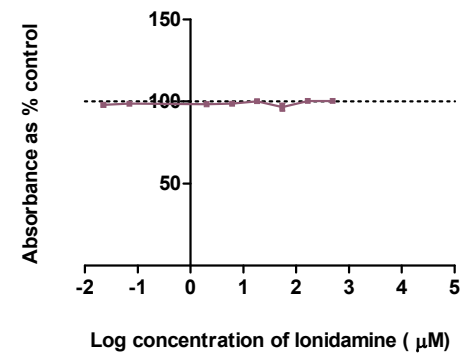

## RES Assay

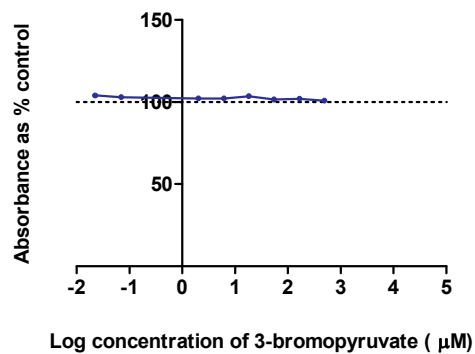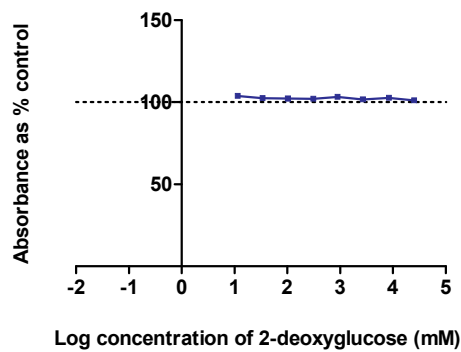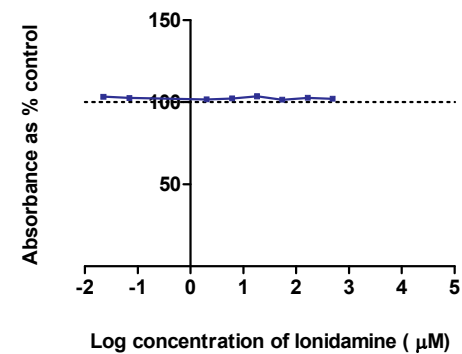

## SRB Assay

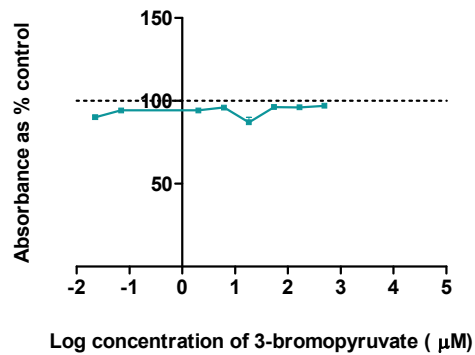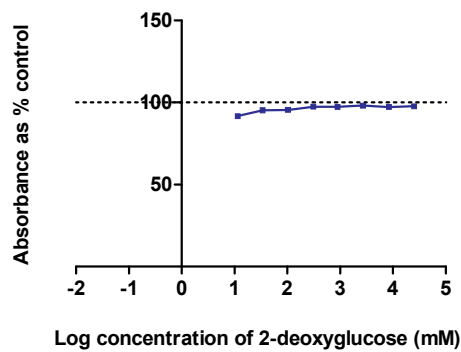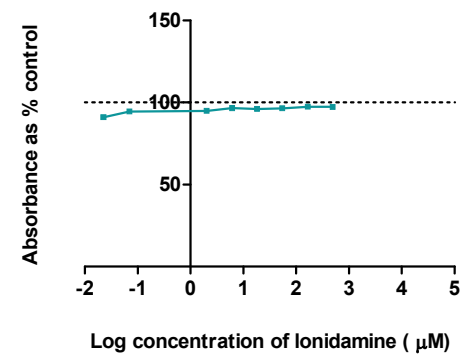

Supplement: 13104_2015_1000_MOESM2_ESM.pdf [file 13104_2015_1000_MOESM2_ESM.pdf]
